# Supplementary material for: Resolution of TLR2-induced inflammation through manipulation of metabolic pathways in Rheumatoid Arthritis
Source: PubMed Central journal article supplement (PMC5320554; doi:10.1038/srep43165), 2017-02-22

## **Resolution of TLR2-induced inflammation through manipulation of metabolic pathways in Rheumatoid Arthritis**

**Trudy McGarry**<sup>1,2</sup>, Monika Binińska<sup>2</sup>, Wei Gao<sup>2</sup>, Deborah Cluxton<sup>3</sup>, Mary Canavan<sup>1,2</sup>, Siobhan Wade<sup>1</sup>, Sarah Wade<sup>1,2</sup>, Lorna Gallagher<sup>2</sup>, Carl Orr<sup>2</sup>, Douglas J. Veale<sup>2</sup>, Ursula Fearon<sup>1\*</sup>

<sup>1</sup> Molecular Rheumatology, School of Medicine, Trinity Biomedical Sciences Institute, Trinity College Dublin, Dublin 2, Ireland.

<sup>2</sup> Centre for Arthritis and Rheumatic Diseases, St. Vincent's University Hospital, Dublin, Ireland.

<sup>3</sup> School of Biochemistry and Immunology, Trinity Biomedical Sciences Institute, Trinity College Dublin, Dublin 2, Ireland.

Corresponding author:

\*Ursula Fearon

Prof. of Molecular Rheumatology  
Trinity Biomedical Sciences Centre  
Trinity College Dublin  
Phone: (01) 896 2659  
Email: [fearonu@tcd.ie](mailto:fearonu@tcd.ie)  
prtl

## Supplementary Figure 1

**Full-Length Western Blots.** **a** demonstrates full-length western blots of PKM2 and  $\beta$  Actin loading control protein in rheumatoid arthritis (RA) synovial fibroblast cells from 3 RA patients (RA1 – 3) in whole cell lysates under basal control or Pam3CSK4-treated (1  $\mu$ g/ml) conditions. **b** demonstrates full-length western blots of PKM2 and  $\beta$  Actin loading control protein in basal and Pam3CSK4-stimulated RASFC nuclear and cytoplasmic fragments. **c** demonstrates full-length western blots of Notch1-IC, p-STAT3 and NF $\kappa$ B and loading control proteins total STAT3 and  $\beta$  Actin in whole cell lysates from K4IM synoviocytes stimulated with Pam3CSK4 in the presence and absence of glycolytic inhibitor 3PO (20  $\mu$ M) or DMSO vehicle control. Far right lane in blots **a – b** demonstrates molecular size marker. Membranes in western blots in **c** were cut prior to incubation with primary antibody.

**a**

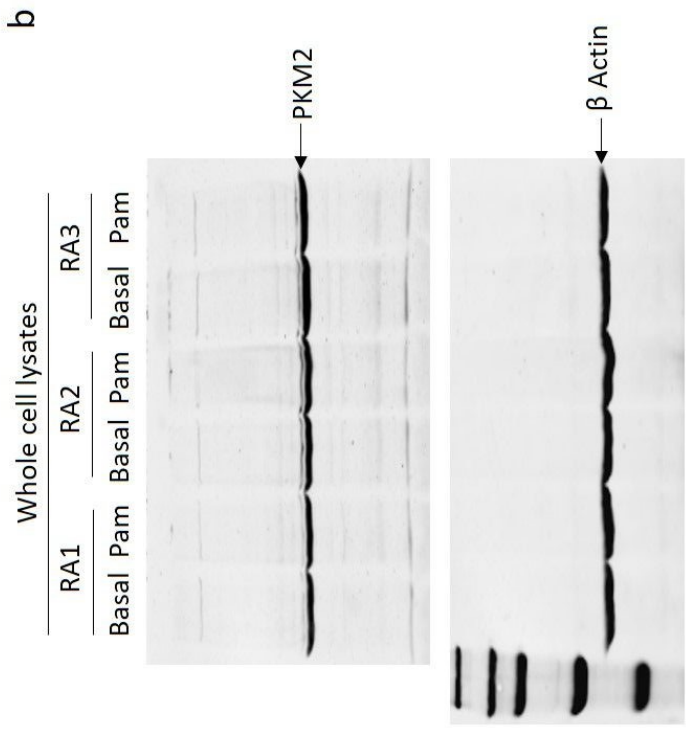

**b**

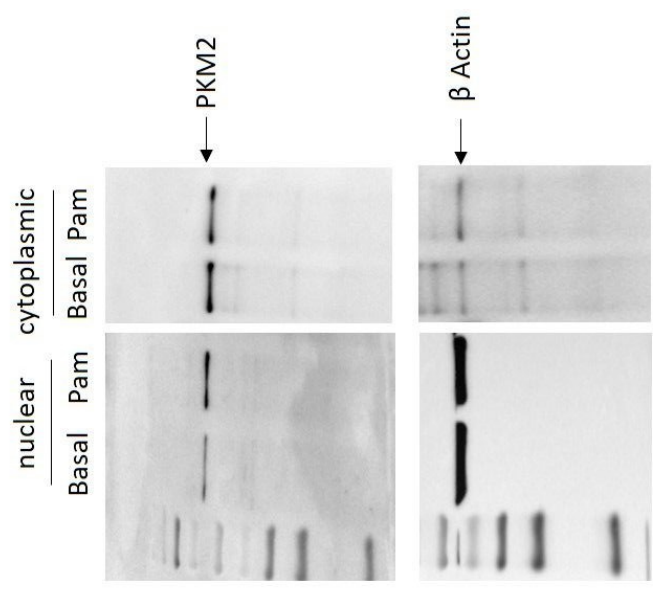

**c**

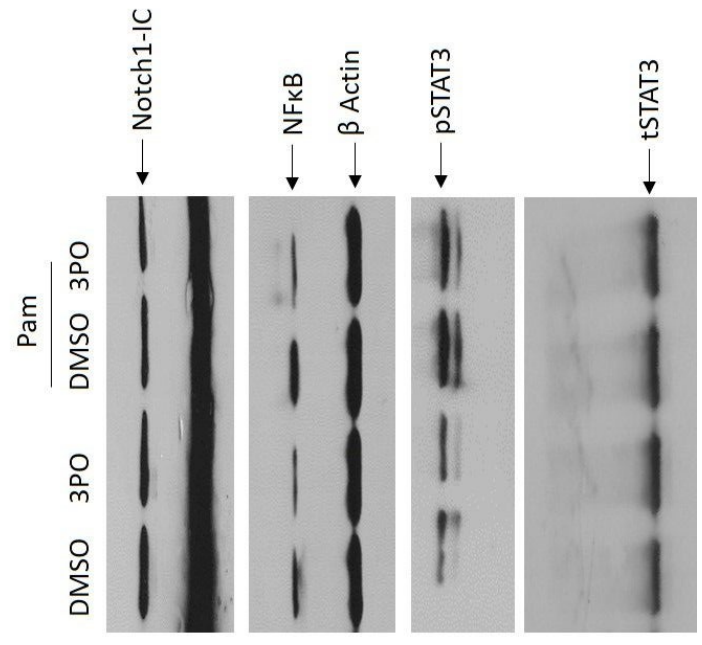

Supplement: srep43165-s1.pdf [file srep43165-s1.pdf]
